# Supplementary material for: Gas-phase and water-mediated mechanisms for the OCS + OH reaction
Source: Royal Society of Chemistry journal article supplement (doi:10.1039/d4cp04549a), 2025-01-01
Supplement: d4cp04549a1.pdf [file d4cp04549a1.pdf]

## Electronic Supplementary Information (ESI)

# Gas-phase and water-mediated mechanisms for the OCS + OH reaction

Joel Leitão Nascimento, and Tiago Vinicius Alves\*

*Departamento de Físico-Química, Instituto de Química, Universidade Federal da Bahia,  
Rua Barão de Jeremoabo, 147, Salvador, Bahia, 40170-115, Brazil*

\*E-mail address: [tiagova@ufba.br](mailto:tiagova@ufba.br)

## Sections

|       |                                                                                                                                    |    |
|-------|------------------------------------------------------------------------------------------------------------------------------------|----|
| S.1.  | Gas-phase mechanism . . . . .                                                                                                      | 3  |
| S.1.1 | Low- (LL) and high-level (HL) electronic energies, cartesian coordinates and non-scaled harmonic vibrational frequencies . . . . . | 3  |
| S.1.2 | CVT-ISPE/SCT thermal rate constants . . . . .                                                                                      | 8  |
| S.1.3 | Pre-equilibrium model (PEM) . . . . .                                                                                              | 15 |
| S.2.  | Water-mediated mechanism . . . . .                                                                                                 | 16 |
| S.2.1 | Low- (LL) and high-level (HL) electronic energies, cartesian coordinates and non-scaled harmonic vibrational frequencies . . . . . | 16 |
| S.2.2 | Two- and three-body equilibrium constants, unimolecular, and bimolecular rate constants . . . . .                                  | 25 |
| S.2.3 | Termolecular rate constants . . . . .                                                                                              | 28 |

## Tables

|      |                                                                                                                                       |    |
|------|---------------------------------------------------------------------------------------------------------------------------------------|----|
| S.1. | Branching ratios (in percentage) for the formation of gas-phase and water-assisted mechanism products for RH=20% and RH=100%. . . . . | 30 |
|------|---------------------------------------------------------------------------------------------------------------------------------------|----|

## Figures

|      |                                                                                                |    |
|------|------------------------------------------------------------------------------------------------|----|
| S.1. | Complexes from the long-range interactions between OH radicals, OCS and water monomer. . . . . | 25 |
|------|------------------------------------------------------------------------------------------------|----|

## S.1. Gas-phase mechanism

### S.1.1 Low- (LL) and high-level (HL) electronic energies, cartesian coordinates and non-scaled harmonic vibrational frequencies

LL = M06-2X/aug-cc-pVTZ

HL = CCSD(T)/aug-cc-pVTZ

COS

LL = -511.542710639 HL = -510.92974915

|    |             |             |              |
|----|-------------|-------------|--------------|
| 6  | 0.000000000 | 0.000000000 | -0.528126000 |
| 8  | 0.000000000 | 0.000000000 | -1.676733000 |
| 16 | 0.000000000 | 0.000000000 | 1.036414000  |

Frequencies -- 535.4970 535.4970 885.5288

Frequencies -- 2157.1138

OH

LL = -75.7338089766 HL = -75.64558487

|   |             |             |              |
|---|-------------|-------------|--------------|
| 8 | 0.000000000 | 0.000000000 | -0.110321000 |
| 1 | 0.000000000 | 0.000000000 | 0.861756000  |

Frequencies -- 3764.3649

PRC

LL = -587.281124853 HL = -586.57791056

|    |              |              |              |
|----|--------------|--------------|--------------|
| 6  | 0.753441000  | 0.384736000  | 0.006957000  |
| 8  | 1.064742000  | 1.486772000  | 0.017229000  |
| 16 | 0.352917000  | -1.133921000 | -0.008903000 |
| 8  | -2.038761000 | 0.504566000  | -0.080306000 |
| 1  | -2.375167000 | -0.096384000 | 0.605318000  |

|                |          |           |           |
|----------------|----------|-----------|-----------|
| Frequencies -- | 62.2894  | 104.1798  | 134.7177  |
| Frequencies -- | 362.6218 | 533.3290  | 536.9645  |
| Frequencies -- | 875.7245 | 2170.0900 | 3769.0975 |

TS1

LL = -587.270941995 HL = -586.56970801

|    |              |              |              |
|----|--------------|--------------|--------------|
| 6  | 0.510114000  | 0.399936000  | -0.003962000 |
| 8  | 1.623556000  | 0.665520000  | -0.012416000 |
| 16 | -1.097927000 | 0.425498000  | 0.001634000  |
| 8  | 0.194431000  | -1.583938000 | 0.110772000  |
| 1  | -0.037753000 | -1.860233000 | -0.789218000 |

|                |           |           |           |
|----------------|-----------|-----------|-----------|
| Frequencies -- | -429.0270 | 236.3487  | 350.9136  |
| Frequencies -- | 443.9066  | 554.0574  | 759.4635  |
| Frequencies -- | 815.5516  | 2139.6775 | 3788.6246 |

I1

LL = -587.327338696 HL = -586.62145862

|    |              |              |              |
|----|--------------|--------------|--------------|
| 6  | -0.436999000 | 0.122444000  | 0.000018000  |
| 8  | -0.974611000 | 1.190250000  | -0.000003000 |
| 16 | 1.309559000  | -0.056799000 | -0.000003000 |
| 8  | -1.064590000 | -1.058311000 | 0.000005000  |
| 1  | -2.017346000 | -0.881389000 | -0.000065000 |

|                |           |           |           |
|----------------|-----------|-----------|-----------|
| Frequencies -- | 313.4671  | 478.6970  | 500.2445  |
| Frequencies -- | 693.1089  | 739.9615  | 1156.5500 |
| Frequencies -- | 1341.6097 | 1812.6639 | 3774.6767 |

TS2

LL = -587.312794795 HL = -586.60715708

|   |             |             |              |
|---|-------------|-------------|--------------|
| 6 | 0.450825000 | 0.151574000 | -0.009268000 |
| 8 | 0.989452000 | 1.208489000 | 0.017067000  |

|    |              |              |              |
|----|--------------|--------------|--------------|
| 16 | -1.292885000 | -0.049321000 | 0.003362000  |
| 8  | 1.102594000  | -1.044485000 | -0.111790000 |
| 1  | 1.244845000  | -1.432351000 | 0.759608000  |

|                |           |           |           |
|----------------|-----------|-----------|-----------|
| Frequencies -- | -483.9288 | 293.7312  | 481.0081  |
| Frequencies -- | 614.4725  | 773.0255  | 1103.1479 |
| Frequencies -- | 1168.0984 | 1851.4268 | 3841.7384 |

I2

LL = -587.321341856 HL = -585.53449146

|    |              |              |             |
|----|--------------|--------------|-------------|
| 6  | 0.000000000  | 0.486312000  | 0.000000000 |
| 8  | -0.915158000 | 1.246541000  | 0.000000000 |
| 16 | -0.298344000 | -1.258067000 | 0.000000000 |
| 8  | 1.276409000  | 0.887584000  | 0.000000000 |
| 1  | 1.883500000  | 0.138211000  | 0.000000000 |

|                |           |           |           |
|----------------|-----------|-----------|-----------|
| Frequencies -- | 308.0753  | 391.3234  | 471.2157  |
| Frequencies -- | 658.0811  | 750.9707  | 1147.5627 |
| Frequencies -- | 1295.3536 | 1841.1761 | 3832.1983 |

TS3

LL = -587.259810300 HL = -586.55603805

|    |              |              |              |
|----|--------------|--------------|--------------|
| 6  | -0.834012000 | -0.011535000 | 0.000172000  |
| 8  | -1.510438000 | -0.949321000 | -0.000103000 |
| 16 | 1.413653000  | -0.207183000 | 0.000027000  |
| 8  | -0.752393000 | 1.229510000  | 0.000070000  |
| 1  | 0.488273000  | 1.142627000  | -0.001201000 |

|                |            |           |           |
|----------------|------------|-----------|-----------|
| Frequencies -- | -1673.9647 | 249.8989  | 463.6682  |
| Frequencies -- | 570.8740   | 688.1609  | 740.0547  |
| Frequencies -- | 1281.6800  | 1621.0210 | 2177.3570 |

HS

LL = -398.738845133 HL = -398.29133188

|    |             |             |              |
|----|-------------|-------------|--------------|
| 16 | 0.000000000 | 0.000000000 | 0.078952000  |
| 1  | 0.000000000 | 0.000000000 | -1.263234000 |

Frequencies -- 2747.4754

C02

LL = -188.594208121 HL = -188.34004637

|   |             |             |              |
|---|-------------|-------------|--------------|
| 6 | 0.000000000 | 0.000000000 | -0.000001000 |
| 8 | 0.000000000 | 0.000000000 | -1.155241000 |
| 8 | 0.000000000 | 0.000000000 | 1.155241000  |

Frequencies -- 694.2549 694.2549 1411.4670

Frequencies -- 2445.0400

TS4

LL = -587.274486216 HL = -586.57207377

|    |              |              |              |
|----|--------------|--------------|--------------|
| 6  | -1.034543000 | -0.005385000 | 0.000567000  |
| 8  | -2.030814000 | 0.567588000  | -0.007423000 |
| 16 | 0.360476000  | -0.734706000 | 0.010173000  |
| 8  | 1.852873000  | 0.773963000  | -0.113968000 |
| 1  | 1.809738000  | 0.953084000  | -1.065389000 |

Frequencies -- -221.8238 87.8830 201.8496

Frequencies -- 479.4715 533.6411 814.3160

Frequencies -- 859.2223 2135.0380 3791.9915

I3

LL = -587.278795227 HL = -586.57307902

|   |             |              |             |
|---|-------------|--------------|-------------|
| 6 | 0.122865000 | -0.924610000 | 1.601201000 |
| 8 | 0.172713000 | -0.501980000 | 2.690033000 |

|    |             |              |              |
|----|-------------|--------------|--------------|
| 16 | 0.549550000 | -0.615823000 | 0.007463000  |
| 8  | 1.422889000 | 0.815282000  | -0.121938000 |
| 1  | 0.805529000 | 1.555764000  | -0.152902000 |

|                |           |           |           |
|----------------|-----------|-----------|-----------|
| Frequencies -- | 82.3385   | 309.1011  | 425.0001  |
| Frequencies -- | 456.5251  | 626.3383  | 711.0247  |
| Frequencies -- | 1125.1925 | 1951.8078 | 3828.1038 |

TS5

LL = -587.271916623 HL = -586.56581538

|    |              |              |              |
|----|--------------|--------------|--------------|
| 6  | -1.339643000 | -0.517360000 | 0.056555000  |
| 8  | -1.856316000 | 0.493757000  | -0.051154000 |
| 16 | 0.772082000  | -0.628735000 | -0.013273000 |
| 8  | 1.185977000  | 0.954596000  | -0.110032000 |
| 1  | 1.194200000  | 1.228472000  | -1.034087000 |

|                |           |           |           |
|----------------|-----------|-----------|-----------|
| Frequencies -- | -306.1930 | 127.2491  | 172.8561  |
| Frequencies -- | 378.0355  | 445.3964  | 850.5242  |
| Frequencies -- | 1183.3909 | 2063.5985 | 3827.5412 |

H0S

LL = -473.961868133 HL = -473.41883024

|    |              |              |             |
|----|--------------|--------------|-------------|
| 16 | 0.036398000  | -0.599473000 | 0.000000000 |
| 8  | 0.036398000  | 1.030276000  | 0.000000000 |
| 1  | -0.873559000 | 1.349359000  | 0.000000000 |

|                |          |           |           |
|----------------|----------|-----------|-----------|
| Frequencies -- | 895.5899 | 1184.2235 | 3817.2191 |
|----------------|----------|-----------|-----------|

C0

LL = -113.320239086 HL = -113.16172486

|   |             |             |              |
|---|-------------|-------------|--------------|
| 6 | 0.000000000 | 0.000000000 | -0.640789000 |
| 8 | 0.000000000 | 0.000000000 | 0.480592000  |

Frequencies -- 2269.5264

## S.1.2 CVT-ISPE/SCT thermal rate constants

cos + oh --> i1

|        |           |
|--------|-----------|
| 250.00 | 9.215E-17 |
| 260.00 | 1.349E-16 |
| 270.00 | 1.925E-16 |
| 280.00 | 2.683E-16 |
| 290.00 | 3.663E-16 |
| 300.00 | 4.905E-16 |
| 310.00 | 6.457E-16 |
| 320.00 | 8.368E-16 |
| 330.00 | 1.069E-15 |
| 340.00 | 1.348E-15 |
| 350.00 | 1.680E-15 |
| 360.00 | 2.070E-15 |
| 370.00 | 2.525E-15 |
| 380.00 | 3.052E-15 |
| 390.00 | 3.656E-15 |
| 400.00 | 4.345E-15 |
| 410.00 | 5.125E-15 |
| 420.00 | 6.004E-15 |
| 430.00 | 6.987E-15 |
| 440.00 | 8.081E-15 |
| 450.00 | 9.295E-15 |
| 460.00 | 1.063E-14 |
| 470.00 | 1.211E-14 |
| 480.00 | 1.372E-14 |
| 490.00 | 1.547E-14 |
| 500.00 | 1.739E-14 |
| 510.00 | 1.945E-14 |
| 520.00 | 2.169E-14 |
| 530.00 | 2.410E-14 |



|                 |           |
|-----------------|-----------|
| 540.00          | 2.668E-14 |
| 550.00          | 2.945E-14 |
| i1 --> cos + oh |           |
| 250.00          | 8.484E-14 |
| 260.00          | 9.010E-13 |
| 270.00          | 8.057E-12 |
| 280.00          | 6.177E-11 |
| 290.00          | 4.125E-10 |
| 300.00          | 2.432E-09 |
| 310.00          | 1.282E-08 |
| 320.00          | 6.097E-08 |
| 330.00          | 2.643E-07 |
| 340.00          | 1.053E-06 |
| 350.00          | 3.880E-06 |
| 360.00          | 1.331E-05 |
| 370.00          | 4.279E-05 |
| 380.00          | 1.294E-04 |
| 390.00          | 3.703E-04 |
| 400.00          | 1.006E-03 |
| 410.00          | 2.605E-03 |
| 420.00          | 6.452E-03 |
| 430.00          | 1.533E-02 |
| 440.00          | 3.503E-02 |
| 450.00          | 7.723E-02 |
| 460.00          | 1.646E-01 |
| 470.00          | 3.398E-01 |
| 480.00          | 6.810E-01 |
| 490.00          | 1.327E+00 |
| 500.00          | 2.519E+00 |
| 510.00          | 4.665E+00 |
| 520.00          | 8.440E+00 |
| 530.00          | 1.494E+01 |
| 540.00          | 2.589E+01 |
| 550.00          | 4.399E+01 |

i1 --> i2

|        |           |
|--------|-----------|
| 250.00 | 1.991E+06 |
| 260.00 | 3.636E+06 |
| 270.00 | 6.370E+06 |
| 280.00 | 1.075E+07 |
| 290.00 | 1.753E+07 |
| 300.00 | 2.772E+07 |
| 310.00 | 4.263E+07 |
| 320.00 | 6.390E+07 |
| 330.00 | 9.360E+07 |
| 340.00 | 1.342E+08 |
| 350.00 | 1.887E+08 |
| 360.00 | 2.605E+08 |
| 370.00 | 3.538E+08 |
| 380.00 | 4.732E+08 |
| 390.00 | 6.239E+08 |
| 400.00 | 8.117E+08 |
| 410.00 | 1.043E+09 |
| 420.00 | 1.326E+09 |
| 430.00 | 1.667E+09 |
| 440.00 | 2.074E+09 |
| 450.00 | 2.558E+09 |
| 460.00 | 3.127E+09 |
| 470.00 | 3.791E+09 |
| 480.00 | 4.561E+09 |
| 490.00 | 5.448E+09 |
| 500.00 | 6.462E+09 |
| 510.00 | 7.616E+09 |
| 520.00 | 8.922E+09 |
| 530.00 | 1.039E+10 |
| 540.00 | 1.204E+10 |
| 550.00 | 1.387E+10 |

i2 --> i1

|        |           |
|--------|-----------|
| 250.00 | 1.251E+09 |
|--------|-----------|

|        |           |
|--------|-----------|
| 260.00 | 1.769E+09 |
| 270.00 | 2.445E+09 |
| 280.00 | 3.310E+09 |
| 290.00 | 4.396E+09 |
| 300.00 | 5.738E+09 |
| 310.00 | 7.372E+09 |
| 320.00 | 9.337E+09 |
| 330.00 | 1.167E+10 |
| 340.00 | 1.441E+10 |
| 350.00 | 1.760E+10 |
| 360.00 | 2.127E+10 |
| 370.00 | 2.546E+10 |
| 380.00 | 3.021E+10 |
| 390.00 | 3.556E+10 |
| 400.00 | 4.153E+10 |
| 410.00 | 4.817E+10 |
| 420.00 | 5.549E+10 |
| 430.00 | 6.354E+10 |
| 440.00 | 7.233E+10 |
| 450.00 | 8.190E+10 |
| 460.00 | 9.226E+10 |
| 470.00 | 1.034E+11 |
| 480.00 | 1.154E+11 |
| 490.00 | 1.283E+11 |
| 500.00 | 1.420E+11 |
| 510.00 | 1.566E+11 |
| 520.00 | 1.721E+11 |
| 530.00 | 1.885E+11 |
| 540.00 | 2.057E+11 |
| 550.00 | 2.239E+11 |

i2 --> hs + co2

|        |           |
|--------|-----------|
| 250.00 | 3.803E-13 |
| 260.00 | 2.049E-12 |
| 270.00 | 1.017E-11 |

|        |           |
|--------|-----------|
| 280.00 | 4.675E-11 |
| 290.00 | 1.999E-10 |
| 300.00 | 8.002E-10 |
| 310.00 | 3.012E-09 |
| 320.00 | 1.071E-08 |
| 330.00 | 3.611E-08 |
| 340.00 | 1.158E-07 |
| 350.00 | 3.547E-07 |
| 360.00 | 1.039E-06 |
| 370.00 | 2.917E-06 |
| 380.00 | 7.870E-06 |
| 390.00 | 2.043E-05 |
| 400.00 | 5.116E-05 |
| 410.00 | 1.237E-04 |
| 420.00 | 2.892E-04 |
| 430.00 | 6.550E-04 |
| 440.00 | 1.439E-03 |
| 450.00 | 3.071E-03 |
| 460.00 | 6.376E-03 |
| 470.00 | 1.289E-02 |
| 480.00 | 2.542E-02 |
| 490.00 | 4.892E-02 |
| 500.00 | 9.204E-02 |
| 510.00 | 1.694E-01 |
| 520.00 | 3.054E-01 |
| 530.00 | 5.397E-01 |
| 540.00 | 9.358E-01 |
| 550.00 | 1.594E+00 |

cos + oh --> i3

|        |           |
|--------|-----------|
| 250.00 | 1.630E-15 |
| 260.00 | 2.229E-15 |
| 270.00 | 2.985E-15 |
| 280.00 | 3.921E-15 |
| 290.00 | 5.064E-15 |
| 300.00 | 6.439E-15 |

|        |           |
|--------|-----------|
| 310.00 | 8.074E-15 |
| 320.00 | 9.996E-15 |
| 330.00 | 1.223E-14 |
| 340.00 | 1.481E-14 |
| 350.00 | 1.776E-14 |
| 360.00 | 2.111E-14 |
| 370.00 | 2.489E-14 |
| 380.00 | 2.912E-14 |
| 390.00 | 3.383E-14 |
| 400.00 | 3.905E-14 |
| 410.00 | 4.480E-14 |
| 420.00 | 5.111E-14 |
| 430.00 | 5.800E-14 |
| 440.00 | 6.550E-14 |
| 450.00 | 7.364E-14 |
| 460.00 | 8.242E-14 |
| 470.00 | 9.188E-14 |
| 480.00 | 1.020E-13 |
| 490.00 | 1.129E-13 |
| 500.00 | 1.245E-13 |
| 510.00 | 1.369E-13 |
| 520.00 | 1.501E-13 |
| 530.00 | 1.640E-13 |
| 540.00 | 1.788E-13 |
| 550.00 | 1.944E-13 |

i3 --> cos + oh

|        |           |
|--------|-----------|
| 250.00 | 2.418E+12 |
| 260.00 | 2.537E+12 |
| 270.00 | 2.654E+12 |
| 280.00 | 2.770E+12 |
| 290.00 | 2.885E+12 |
| 300.00 | 2.998E+12 |
| 310.00 | 3.110E+12 |
| 320.00 | 3.221E+12 |

|        |           |
|--------|-----------|
| 330.00 | 3.330E+12 |
| 340.00 | 3.437E+12 |
| 350.00 | 3.543E+12 |
| 360.00 | 3.647E+12 |
| 370.00 | 3.750E+12 |
| 380.00 | 3.851E+12 |
| 390.00 | 3.950E+12 |
| 400.00 | 4.048E+12 |
| 410.00 | 4.144E+12 |
| 420.00 | 4.238E+12 |
| 430.00 | 4.331E+12 |
| 440.00 | 4.423E+12 |
| 450.00 | 4.512E+12 |
| 460.00 | 4.601E+12 |
| 470.00 | 4.687E+12 |
| 480.00 | 4.773E+12 |
| 490.00 | 4.856E+12 |
| 500.00 | 4.939E+12 |
| 510.00 | 5.020E+12 |
| 520.00 | 5.099E+12 |
| 530.00 | 5.177E+12 |
| 540.00 | 5.254E+12 |
| 550.00 | 5.330E+12 |

i3 --> hos + co

|        |           |
|--------|-----------|
| 250.00 | 2.531E+09 |
| 260.00 | 3.507E+09 |
| 270.00 | 4.748E+09 |
| 280.00 | 6.298E+09 |
| 290.00 | 8.200E+09 |
| 300.00 | 1.050E+10 |
| 310.00 | 1.324E+10 |
| 320.00 | 1.646E+10 |
| 330.00 | 2.021E+10 |
| 340.00 | 2.452E+10 |

|        |           |
|--------|-----------|
| 350.00 | 2.943E+10 |
| 360.00 | 3.497E+10 |
| 370.00 | 4.119E+10 |
| 380.00 | 4.810E+10 |
| 390.00 | 5.572E+10 |
| 400.00 | 6.409E+10 |
| 410.00 | 7.323E+10 |
| 420.00 | 8.313E+10 |
| 430.00 | 9.382E+10 |
| 440.00 | 1.053E+11 |
| 450.00 | 1.176E+11 |
| 460.00 | 1.307E+11 |
| 470.00 | 1.446E+11 |
| 480.00 | 1.594E+11 |
| 490.00 | 1.749E+11 |
| 500.00 | 1.912E+11 |
| 510.00 | 2.083E+11 |
| 520.00 | 2.262E+11 |
| 530.00 | 2.449E+11 |
| 540.00 | 2.643E+11 |
| 550.00 | 2.845E+11 |

### S.1.3 Pre-equilibrium model (PEM)

The interaction between COS and OH forms a pre-reactive complex ( $\text{PC}_{\text{OH}}$ ) thermodynamically more stable than the isolated reactants. After that, it produces the intermediate 1 (I1), passing by the TS1, i.e.,

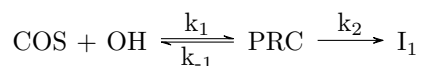

Applying the pre-equilibrium model, the overall effective rate constant for the reaction pathway can be calculated as the product of the equilibrium constant for PRC formation and the subsequent unimolecular rate constant, i.e.,:

$$k_{\text{PEM}} = K_{\text{eq}} k_{\text{uni}}^{\text{CVT-ISPE/SCT}} \quad (1)$$

## S.2. Water-mediated mechanism

### S.2.1 Low- (LL) and high-level (HL) electronic energies, cartesian coordinates and non-scaled harmonic vibrational frequencies

H2O

LL = -76.4301040421 HL = -76.34228852

|   |              |              |             |
|---|--------------|--------------|-------------|
| 8 | 0.000000000  | 0.116357000  | 0.000000000 |
| 1 | 0.762603000  | -0.465429000 | 0.000000000 |
| 1 | -0.762603000 | -0.465429000 | 0.000000000 |

Frequencies -- 1617.8382 3868.7250 3972.0575

OH-H2O

LL = -152.173547669 HL = -151.99724315

|   |              |              |              |
|---|--------------|--------------|--------------|
| 8 | 1.256589000  | -0.000068000 | -0.063815000 |
| 1 | 1.756940000  | -0.767126000 | 0.223409000  |
| 1 | 1.754331000  | 0.768961000  | 0.222674000  |
| 1 | -0.638136000 | -0.002687000 | -0.038385000 |
| 8 | -1.615731000 | 0.000174000  | 0.012853000  |

Frequencies -- 112.3515 151.2774 196.1759

Frequencies -- 398.3763 608.1718 1615.8283

Frequencies -- 3637.2115 3862.4027 3964.5616

CPOH

LL = -587.281124853 HL = -586.57791056

|    |              |              |              |
|----|--------------|--------------|--------------|
| 6  | 0.753441000  | 0.384736000  | 0.006957000  |
| 8  | 1.064742000  | 1.486772000  | 0.017229000  |
| 16 | 0.352917000  | -1.133921000 | -0.008903000 |
| 8  | -2.038761000 | 0.504566000  | -0.080306000 |
| 1  | -2.375167000 | -0.096384000 | 0.605318000  |



|                |          |           |           |
|----------------|----------|-----------|-----------|
| Frequencies -- | 62.2894  | 104.1798  | 134.7177  |
| Frequencies -- | 362.6218 | 533.3290  | 536.9645  |
| Frequencies -- | 875.7245 | 2170.0900 | 3769.0975 |

CPW1

LL = -587.976195221 HL = -587.27534972

|    |              |              |              |
|----|--------------|--------------|--------------|
| 6  | -0.010078000 | -0.221710000 | -0.486000000 |
| 8  | -0.012906000 | 0.127509000  | -1.582575000 |
| 16 | -0.006989000 | -0.722178000 | 0.992948000  |
| 8  | 0.062687000  | 2.676802000  | -0.263182000 |
| 1  | 0.050374000  | 2.621959000  | -1.221699000 |
| 1  | 0.084286000  | 3.612731000  | -0.054525000 |

|                |           |           |           |
|----------------|-----------|-----------|-----------|
| Frequencies -- | 55.9300   | 57.5862   | 125.8783  |
| Frequencies -- | 155.3212  | 179.0444  | 537.8100  |
| Frequencies -- | 541.5696  | 893.6569  | 1610.9697 |
| Frequencies -- | 2148.1573 | 3861.3607 | 3966.7219 |

PRC1W1

LL = -663.714750308 HL = -662.92366692

|    |              |              |              |
|----|--------------|--------------|--------------|
| 6  | 0.026313000  | 0.311669000  | -0.108703000 |
| 8  | 0.424745000  | 1.387020000  | -0.139788000 |
| 16 | -0.520897000 | -1.157013000 | -0.071956000 |
| 8  | -2.766297000 | 0.650316000  | 0.079667000  |
| 1  | -3.002253000 | 0.106548000  | 0.849460000  |
| 8  | 2.896339000  | -0.046671000 | 0.152745000  |
| 1  | 2.899909000  | 0.908269000  | 0.052217000  |
| 1  | 3.817069000  | -0.315085000 | 0.137877000  |

|                |          |          |          |
|----------------|----------|----------|----------|
| Frequencies -- | 5.9243   | 48.4109  | 64.8927  |
| Frequencies -- | 70.2469  | 109.0741 | 134.8031 |
| Frequencies -- | 136.0381 | 168.9628 | 186.9321 |

|                |           |           |           |
|----------------|-----------|-----------|-----------|
| Frequencies -- | 375.8185  | 530.5559  | 540.6104  |
| Frequencies -- | 880.9167  | 1613.5844 | 2159.7932 |
| Frequencies -- | 3770.7742 | 3860.5893 | 3965.7991 |

PRC1W2

LL = -663.722553413 HL = -662.93115367

|    |              |              |              |
|----|--------------|--------------|--------------|
| 6  | 0.919356000  | 0.636202000  | -0.188812000 |
| 8  | 0.475686000  | 1.689016000  | -0.338806000 |
| 16 | 1.519354000  | -0.787891000 | 0.024601000  |
| 8  | -1.137941000 | -1.089894000 | -1.347453000 |
| 1  | -1.511397000 | -0.664951000 | -0.547866000 |
| 8  | -1.912024000 | 0.537648000  | 0.876915000  |
| 1  | -2.695671000 | 0.588217000  | 1.428283000  |
| 1  | -1.695671000 | 1.438682000  | 0.620110000  |

|                |           |           |           |
|----------------|-----------|-----------|-----------|
| Frequencies -- | 44.1420   | 59.0704   | 96.1554   |
| Frequencies -- | 123.6457  | 140.3139  | 197.9109  |
| Frequencies -- | 212.8296  | 246.4706  | 503.0794  |
| Frequencies -- | 532.5101  | 542.6088  | 633.7770  |
| Frequencies -- | 895.9357  | 1607.5011 | 2137.6504 |
| Frequencies -- | 3628.8154 | 3849.1197 | 3955.6240 |

PRC1W3

LL = -663.721682910 HL = -662.93004107

|    |              |              |              |
|----|--------------|--------------|--------------|
| 6  | 0.851329000  | -0.223128000 | -0.189690000 |
| 8  | 1.026222000  | -0.505709000 | 0.906170000  |
| 16 | 0.630833000  | 0.149366000  | -1.700020000 |
| 8  | -0.828909000 | 2.116265000  | 0.040046000  |
| 1  | -1.448855000 | 1.361516000  | 0.103737000  |
| 8  | -2.233576000 | -0.389976000 | -0.067114000 |
| 1  | -3.072820000 | -0.739088000 | 0.241555000  |
| 1  | -2.121796000 | -0.702099000 | -0.969188000 |

|                |           |           |           |
|----------------|-----------|-----------|-----------|
| Frequencies -- | 37.5523   | 66.7195   | 92.5128   |
| Frequencies -- | 98.8965   | 125.2020  | 173.4623  |
| Frequencies -- | 193.9449  | 222.8645  | 500.5116  |
| Frequencies -- | 535.8217  | 546.3678  | 589.4631  |
| Frequencies -- | 875.3619  | 1605.8148 | 2171.0602 |
| Frequencies -- | 3642.3636 | 3849.7284 | 3954.4506 |

TS1W1

LL = -663.705237886 HL = -662.91601054

|    |              |              |              |
|----|--------------|--------------|--------------|
| 6  | 0.490743000  | -0.398491000 | 0.082894000  |
| 8  | 1.606460000  | -0.663320000 | 0.099563000  |
| 16 | -1.111207000 | -0.390912000 | 0.090351000  |
| 8  | 0.197702000  | 1.595485000  | -0.180048000 |
| 1  | -0.030918000 | 1.935612000  | 0.698191000  |
| 8  | 0.533041000  | -3.326263000 | 0.403007000  |
| 1  | 0.483257000  | -4.283731000 | 0.373263000  |
| 1  | 1.463054000  | -3.108471000 | 0.303091000  |

|                |           |           |           |
|----------------|-----------|-----------|-----------|
| Frequencies -- | -413.8974 | 18.9107   | 72.6728   |
| Frequencies -- | 91.8793   | 120.8431  | 195.0208  |
| Frequencies -- | 220.9501  | 243.2896  | 347.5998  |
| Frequencies -- | 443.5727  | 553.8203  | 756.4366  |
| Frequencies -- | 822.5441  | 1616.7685 | 2127.9842 |
| Frequencies -- | 3793.6332 | 3860.2281 | 3964.8349 |

TS1W2

LL = -663.710710470 HL = -662.92123206

|    |              |              |              |
|----|--------------|--------------|--------------|
| 6  | -0.815809000 | 0.781459000  | 0.375460000  |
| 8  | -0.444423000 | 1.695991000  | 0.965598000  |
| 16 | -1.604849000 | -0.232852000 | -0.577244000 |
| 8  | 0.357114000  | -0.839667000 | 0.689729000  |
| 1  | 0.989315000  | -0.650683000 | -0.028113000 |
| 8  | 1.886528000  | 0.945306000  | -0.901674000 |

|   |             |             |              |
|---|-------------|-------------|--------------|
| 1 | 2.505644000 | 1.254668000 | -1.565946000 |
| 1 | 1.883787000 | 1.607351000 | -0.204501000 |

|                |           |           |           |
|----------------|-----------|-----------|-----------|
| Frequencies -- | -476.4973 | 53.4279   | 73.5098   |
| Frequencies -- | 99.0623   | 164.3573  | 197.3624  |
| Frequencies -- | 208.4603  | 239.2548  | 449.8387  |
| Frequencies -- | 523.6050  | 611.6243  | 825.9177  |
| Frequencies -- | 863.4242  | 1613.4591 | 2108.0370 |
| Frequencies -- | 3704.5641 | 3850.9997 | 3957.8867 |

TS1W3

LL = -663.710660363 HL = -662.92171957

|    |              |              |              |
|----|--------------|--------------|--------------|
| 6  | 0.867510000  | -0.365732000 | -0.281139000 |
| 8  | 1.222898000  | -1.380058000 | -0.678295000 |
| 16 | 0.597383000  | 1.203632000  | -0.056040000 |
| 8  | -0.220450000 | -0.560412000 | 1.405365000  |
| 1  | -1.123628000 | -0.489406000 | 1.037140000  |
| 8  | -2.550986000 | -0.120026000 | -0.195410000 |
| 1  | -2.368860000 | 0.727542000  | -0.609573000 |
| 1  | -3.504704000 | -0.179125000 | -0.105518000 |

|                |           |           |           |
|----------------|-----------|-----------|-----------|
| Frequencies -- | -492.0601 | 23.8923   | 64.4935   |
| Frequencies -- | 99.1699   | 158.3101  | 182.8872  |
| Frequencies -- | 232.2604  | 247.9007  | 447.6753  |
| Frequencies -- | 528.2661  | 628.9928  | 814.2016  |
| Frequencies -- | 916.7226  | 1607.3209 | 2130.9674 |
| Frequencies -- | 3639.4277 | 3853.8100 | 3957.6612 |

TS1W4

LL = -663.710742875 HL = -662.92177452

|    |              |              |              |
|----|--------------|--------------|--------------|
| 6  | 0.941793000  | 0.040150000  | 0.176640000  |
| 8  | 2.006568000  | 0.378624000  | -0.082101000 |
| 16 | -0.345916000 | -0.791368000 | 0.658399000  |

|   |              |             |              |
|---|--------------|-------------|--------------|
| 8 | -0.419346000 | 1.457195000 | -0.272999000 |
| 1 | -0.561926000 | 1.851860000 | 0.610823000  |
| 8 | -0.531927000 | 2.161900000 | 2.510458000  |
| 1 | -0.488103000 | 1.312398000 | 2.957251000  |
| 1 | 0.083215000  | 2.738535000 | 2.969394000  |

|                |           |           |           |
|----------------|-----------|-----------|-----------|
| Frequencies -- | -496.5579 | 30.5123   | 59.1395   |
| Frequencies -- | 112.4365  | 171.6411  | 184.6258  |
| Frequencies -- | 229.5191  | 247.8973  | 448.0825  |
| Frequencies -- | 533.1126  | 650.3257  | 816.4251  |
| Frequencies -- | 905.4709  | 1612.3420 | 2124.3269 |
| Frequencies -- | 3631.7604 | 3853.1358 | 3955.5178 |

I1W1

LL = -663.768242405 HL = -662.97228643

|    |              |              |              |
|----|--------------|--------------|--------------|
| 6  | -0.324484000 | 0.557060000  | -0.057459000 |
| 8  | 0.454815000  | 1.474521000  | -0.063692000 |
| 16 | 0.097526000  | -1.135343000 | 0.125630000  |
| 8  | -1.646211000 | 0.710565000  | -0.191697000 |
| 1  | -1.819499000 | 1.659258000  | -0.283072000 |
| 8  | 2.714987000  | -0.145477000 | 0.331226000  |
| 1  | 3.215572000  | -0.289297000 | -0.475084000 |
| 1  | 2.229875000  | 0.680798000  | 0.196135000  |

|                |           |           |           |
|----------------|-----------|-----------|-----------|
| Frequencies -- | 64.6326   | 114.2780  | 172.3225  |
| Frequencies -- | 219.1903  | 282.9758  | 353.3723  |
| Frequencies -- | 497.8857  | 504.0318  | 580.6329  |
| Frequencies -- | 705.1312  | 750.3333  | 1160.9692 |
| Frequencies -- | 1346.6724 | 1623.8159 | 1776.8061 |
| Frequencies -- | 3751.1598 | 3777.9347 | 3924.5531 |

I1W2

LL = -663.775968115 HL = -662.98150763

|    |              |              |              |
|----|--------------|--------------|--------------|
| 6  | 0.819479000  | -0.632414000 | 0.535986000  |
| 8  | 1.844101000  | -0.953326000 | 1.086671000  |
| 16 | 0.666929000  | 0.932455000  | -0.250253000 |
| 8  | -0.275208000 | -1.361806000 | 0.443525000  |
| 1  | -0.111633000 | -2.222460000 | 0.906054000  |
| 8  | 0.729611000  | -3.396196000 | 1.857039000  |
| 1  | 1.528290000  | -2.848218000 | 1.851218000  |
| 1  | 0.990249000  | -4.283110000 | 1.600138000  |

|                |           |           |           |
|----------------|-----------|-----------|-----------|
| Frequencies -- | 67.0280   | 149.1644  | 194.4617  |
| Frequencies -- | 224.8518  | 324.7023  | 351.5074  |
| Frequencies -- | 495.4661  | 567.3123  | 677.3746  |
| Frequencies -- | 788.0228  | 862.4342  | 1247.3483 |
| Frequencies -- | 1448.7453 | 1608.1016 | 1767.4556 |
| Frequencies -- | 3316.7612 | 3752.6330 | 3931.4594 |

I1W3

LL = -663.768124364 HL = -662.97354597

|    |              |              |              |
|----|--------------|--------------|--------------|
| 6  | 1.002240000  | -0.640799000 | -0.075825000 |
| 8  | 2.129869000  | -0.924604000 | 0.189878000  |
| 16 | 0.700009000  | 0.410344000  | -1.483259000 |
| 8  | -0.051568000 | -1.055470000 | 0.607547000  |
| 1  | -0.886196000 | -0.713116000 | 0.229368000  |
| 8  | -2.316316000 | -0.024295000 | -0.561799000 |
| 1  | -2.486853000 | 0.920799000  | -0.530318000 |
| 1  | -2.579818000 | -0.321589000 | -1.436720000 |

|                |           |           |           |
|----------------|-----------|-----------|-----------|
| Frequencies -- | 61.1542   | 82.1336   | 97.8881   |
| Frequencies -- | 172.2442  | 208.5570  | 276.4306  |
| Frequencies -- | 326.0465  | 476.1004  | 666.3264  |
| Frequencies -- | 761.7915  | 815.3266  | 1207.5408 |
| Frequencies -- | 1381.4620 | 1617.4265 | 1834.8275 |
| Frequencies -- | 3535.4911 | 3849.8795 | 3949.3904 |

TS4W1

LL = -663.708889110 HL = -662.91841356

|    |              |              |              |
|----|--------------|--------------|--------------|
| 6  | 0.940440000  | 0.166111000  | 0.293729000  |
| 8  | 1.892210000  | 0.811322000  | 0.293797000  |
| 16 | -0.407193000 | -0.644936000 | 0.277363000  |
| 8  | -1.942254000 | 0.734578000  | -0.264741000 |
| 1  | -2.055883000 | 1.170942000  | 0.592543000  |
| 8  | 2.843138000  | -1.941064000 | 0.071297000  |
| 1  | 3.600272000  | -1.356954000 | -0.014379000 |
| 1  | 3.159699000  | -2.814662000 | -0.167454000 |

|                |           |           |           |
|----------------|-----------|-----------|-----------|
| Frequencies -- | -196.4248 | 10.6652   | 47.4553   |
| Frequencies -- | 89.1147   | 94.6215   | 113.3222  |
| Frequencies -- | 147.0211  | 164.6103  | 203.7155  |
| Frequencies -- | 482.4340  | 537.8643  | 808.8276  |
| Frequencies -- | 864.1723  | 1614.4882 | 2134.2924 |
| Frequencies -- | 3796.7687 | 3861.1773 | 3965.6060 |

TS4W2

LL = -663.713850047 HL = -662.92322062

|    |              |              |              |
|----|--------------|--------------|--------------|
| 6  | -0.012994000 | -0.724754000 | 1.563018000  |
| 8  | 0.452047000  | -0.536584000 | 2.604117000  |
| 16 | -0.686403000 | -0.879266000 | 0.157708000  |
| 8  | -1.583506000 | 0.972906000  | -0.336049000 |
| 1  | -1.886921000 | 1.202207000  | 0.560791000  |
| 8  | -2.058211000 | 1.195717000  | 2.576191000  |
| 1  | -1.322512000 | 1.244752000  | 3.192380000  |
| 1  | -2.841498000 | 1.437723000  | 3.074967000  |

|                |           |          |          |
|----------------|-----------|----------|----------|
| Frequencies -- | -275.8463 | 33.8502  | 55.4040  |
| Frequencies -- | 92.3341   | 114.9692 | 151.6241 |
| Frequencies -- | 171.3427  | 188.1492 | 471.7089 |
| Frequencies -- | 503.6779  | 530.8544 | 873.2487 |

|                |           |           |           |
|----------------|-----------|-----------|-----------|
| Frequencies -- | 942.4560  | 1616.5750 | 2108.2484 |
| Frequencies -- | 3708.5206 | 3854.5601 | 3957.2740 |

I3W1

LL = -663.712725945 HL = -662.91980258

|    |              |              |              |
|----|--------------|--------------|--------------|
| 6  | -0.094908000 | -0.409582000 | -0.367221000 |
| 8  | 0.718591000  | 0.419145000  | -0.202065000 |
| 16 | -1.752646000 | -0.675736000 | -0.343170000 |
| 8  | -2.567964000 | 0.746898000  | -0.002987000 |
| 1  | -2.590526000 | 0.876491000  | 0.952770000  |
| 8  | 3.566483000  | -0.636154000 | 0.091552000  |
| 1  | 2.750202000  | -0.143548000 | -0.034069000 |
| 1  | 4.259752000  | -0.074966000 | -0.259998000 |

|                |           |           |           |
|----------------|-----------|-----------|-----------|
| Frequencies -- | 10.4517   | 14.6824   | 48.7869   |
| Frequencies -- | 75.7371   | 140.1747  | 202.2277  |
| Frequencies -- | 309.8038  | 321.0054  | 447.2847  |
| Frequencies -- | 457.2587  | 627.7643  | 729.3166  |
| Frequencies -- | 1132.8459 | 1624.6461 | 1935.4764 |
| Frequencies -- | 3825.5523 | 3847.6293 | 3955.2984 |

I3W2

LL = -663.725412289 HL = -662.93109408

|    |              |              |              |
|----|--------------|--------------|--------------|
| 6  | 0.425869000  | 1.266473000  | -0.022212000 |
| 8  | -0.593937000 | 1.595424000  | -0.516857000 |
| 16 | 1.231091000  | -0.201222000 | 0.265692000  |
| 8  | 0.380878000  | -1.407570000 | -0.465494000 |
| 1  | -0.527483000 | -1.407543000 | -0.095389000 |
| 8  | -2.069757000 | -0.693910000 | 0.448964000  |
| 1  | -2.055100000 | 0.182867000  | 0.044754000  |
| 1  | -2.948273000 | -1.052520000 | 0.307315000  |

|                |         |          |          |
|----------------|---------|----------|----------|
| Frequencies -- | 82.1635 | 126.1259 | 161.0184 |
|----------------|---------|----------|----------|



|                |           |           |           |
|----------------|-----------|-----------|-----------|
| Frequencies -- | 186.1335  | 229.6038  | 321.4880  |
| Frequencies -- | 387.8712  | 415.8439  | 537.1769  |
| Frequencies -- | 596.7005  | 711.6484  | 802.0769  |
| Frequencies -- | 1317.8748 | 1612.1447 | 1882.8054 |
| Frequencies -- | 3499.3301 | 3797.9927 | 3937.6142 |

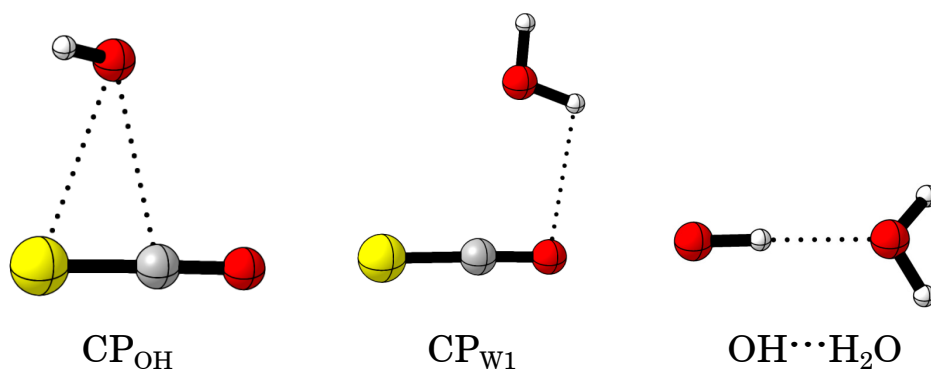

Fig. S.1.: Complexes from the long-range interactions between OH radicals, OCS and water monomer.

## S.2.2 Two- and three-body equilibrium constants, unimolecular, and bimolecular rate constants

### 3B Equilibrium Constants

|     | K(3B)_1  |  | K(3B)_2  |  | K(3B)_3  |
|-----|----------|--|----------|--|----------|
| 250 | 5.24E-47 |  | 3.26E-44 |  | 1.84E-44 |
| 250 | 5.24E-47 |  | 3.26E-44 |  | 1.84E-44 |
| 260 | 4.68E-47 |  | 2.17E-44 |  | 1.29E-44 |
| 270 | 4.23E-47 |  | 1.50E-44 |  | 9.29E-45 |
| 280 | 3.88E-47 |  | 1.06E-44 |  | 6.90E-45 |
| 290 | 3.59E-47 |  | 7.79E-45 |  | 5.25E-45 |
| 300 | 3.35E-47 |  | 5.84E-45 |  | 4.09E-45 |
| 310 | 3.15E-47 |  | 4.48E-45 |  | 3.25E-45 |
| 320 | 2.99E-47 |  | 3.51E-45 |  | 2.63E-45 |
| 330 | 2.86E-47 |  | 2.80E-45 |  | 2.17E-45 |
| 340 | 2.74E-47 |  | 2.27E-45 |  | 1.81E-45 |
| 350 | 2.65E-47 |  | 1.87E-45 |  | 1.53E-45 |

|     |          |  |          |  |          |
|-----|----------|--|----------|--|----------|
| 360 | 2.57E-47 |  | 1.56E-45 |  | 1.32E-45 |
| 370 | 2.50E-47 |  | 1.32E-45 |  | 1.14E-45 |
| 380 | 2.45E-47 |  | 1.13E-45 |  | 1.00E-45 |
| 390 | 2.41E-47 |  | 9.80E-46 |  | 8.87E-46 |
| 400 | 2.37E-47 |  | 8.56E-46 |  | 7.92E-46 |
| 410 | 2.34E-47 |  | 7.56E-46 |  | 7.14E-46 |
| 420 | 2.32E-47 |  | 6.72E-46 |  | 6.48E-46 |
| 430 | 2.31E-47 |  | 6.03E-46 |  | 5.92E-46 |
| 440 | 2.30E-47 |  | 5.44E-46 |  | 5.44E-46 |
| 450 | 2.29E-47 |  | 4.95E-46 |  | 5.03E-46 |
| 460 | 2.29E-47 |  | 4.53E-46 |  | 4.68E-46 |
| 470 | 2.30E-47 |  | 4.17E-46 |  | 4.38E-46 |
| 480 | 2.30E-47 |  | 3.86E-46 |  | 4.11E-46 |
| 490 | 2.31E-47 |  | 3.59E-46 |  | 3.88E-46 |
| 500 | 2.33E-47 |  | 3.35E-46 |  | 3.68E-46 |
| 510 | 2.35E-47 |  | 3.15E-46 |  | 3.50E-46 |
| 520 | 2.37E-47 |  | 2.96E-46 |  | 3.34E-46 |
| 530 | 2.39E-47 |  | 2.80E-46 |  | 3.20E-46 |
| 540 | 2.41E-47 |  | 2.66E-46 |  | 3.08E-46 |
| 550 | 2.44E-47 |  | 2.54E-46 |  | 2.97E-46 |

Unimolecular Rate Constants (CVT-ISPE/SCT)

|     | k_uni_1  |  | k_uni_2  |  | k_uni_3  |  | k_uni_4  |
|-----|----------|--|----------|--|----------|--|----------|
| 250 | 2.67E+07 |  | 5.71E+06 |  | 3.56E+07 |  | 3.46E+07 |
| 250 | 2.67E+07 |  | 5.71E+06 |  | 3.56E+07 |  | 3.46E+07 |
| 260 | 4.08E+07 |  | 8.61E+06 |  | 5.07E+07 |  | 4.94E+07 |
| 270 | 6.05E+07 |  | 1.28E+07 |  | 7.11E+07 |  | 6.93E+07 |
| 280 | 8.73E+07 |  | 1.86E+07 |  | 9.80E+07 |  | 9.56E+07 |
| 290 | 1.23E+08 |  | 2.65E+07 |  | 1.33E+08 |  | 1.30E+08 |
| 300 | 1.70E+08 |  | 3.72E+07 |  | 1.77E+08 |  | 1.73E+08 |
| 310 | 2.29E+08 |  | 5.11E+07 |  | 2.32E+08 |  | 2.27E+08 |
| 320 | 3.04E+08 |  | 6.92E+07 |  | 3.00E+08 |  | 2.93E+08 |
| 330 | 3.96E+08 |  | 9.21E+07 |  | 3.83E+08 |  | 3.74E+08 |
| 340 | 5.09E+08 |  | 1.21E+08 |  | 4.82E+08 |  | 4.70E+08 |
| 350 | 6.45E+08 |  | 1.56E+08 |  | 5.99E+08 |  | 5.84E+08 |

|     |          |  |          |  |          |  |          |
|-----|----------|--|----------|--|----------|--|----------|
| 360 | 8.08E+08 |  | 1.99E+08 |  | 7.35E+08 |  | 7.18E+08 |
| 370 | 9.99E+08 |  | 2.50E+08 |  | 8.94E+08 |  | 8.73E+08 |
| 380 | 1.22E+09 |  | 3.12E+08 |  | 1.08E+09 |  | 1.05E+09 |
| 390 | 1.48E+09 |  | 3.84E+08 |  | 1.28E+09 |  | 1.25E+09 |
| 400 | 1.78E+09 |  | 4.67E+08 |  | 1.52E+09 |  | 1.48E+09 |
| 410 | 2.12E+09 |  | 5.65E+08 |  | 1.78E+09 |  | 1.74E+09 |
| 420 | 2.50E+09 |  | 6.76E+08 |  | 2.07E+09 |  | 2.02E+09 |
| 430 | 2.94E+09 |  | 8.02E+08 |  | 2.39E+09 |  | 2.34E+09 |
| 440 | 3.42E+09 |  | 9.45E+08 |  | 2.75E+09 |  | 2.69E+09 |
| 450 | 3.96E+09 |  | 1.11E+09 |  | 3.13E+09 |  | 3.07E+09 |
| 460 | 4.55E+09 |  | 1.29E+09 |  | 3.56E+09 |  | 3.49E+09 |
| 470 | 5.20E+09 |  | 1.48E+09 |  | 4.01E+09 |  | 3.94E+09 |
| 480 | 5.92E+09 |  | 1.70E+09 |  | 4.51E+09 |  | 4.42E+09 |
| 490 | 6.70E+09 |  | 1.94E+09 |  | 5.04E+09 |  | 4.95E+09 |
| 500 | 7.55E+09 |  | 2.21E+09 |  | 5.60E+09 |  | 5.51E+09 |
| 510 | 8.47E+09 |  | 2.49E+09 |  | 6.21E+09 |  | 5.65E+09 |
| 520 | 9.46E+09 |  | 2.81E+09 |  | 6.85E+09 |  | 6.21E+09 |
| 530 | 1.05E+10 |  | 3.14E+09 |  | 7.53E+09 |  | 6.81E+09 |
| 540 | 1.17E+10 |  | 3.50E+09 |  | 8.25E+09 |  | 7.43E+09 |
| 550 | 1.29E+10 |  | 3.89E+09 |  | 9.00E+09 |  | 8.09E+09 |

2B Equilibrium Constants      Bimolecular Rate Constants (CVT-ISPE/SCT)

|     | K(2B)_1  |  | K(2B)_2  |  | k_bi_1   |  | k_bi_2   |
|-----|----------|--|----------|--|----------|--|----------|
| 250 | 7.90E-23 |  | 1.93E-20 |  | 1.49E-15 |  | 1.25E-16 |
| 250 | 7.90E-23 |  | 1.93E-20 |  | 1.49E-15 |  | 1.25E-16 |
| 260 | 7.46E-23 |  | 1.40E-20 |  | 2.02E-15 |  | 1.73E-16 |
| 270 | 7.10E-23 |  | 1.04E-20 |  | 2.68E-15 |  | 2.35E-16 |
| 280 | 6.80E-23 |  | 7.95E-21 |  | 3.49E-15 |  | 3.13E-16 |
| 290 | 6.56E-23 |  | 6.19E-21 |  | 4.48E-15 |  | 4.10E-16 |
| 300 | 6.35E-23 |  | 4.91E-21 |  | 5.66E-15 |  | 5.29E-16 |
| 310 | 6.18E-23 |  | 3.96E-21 |  | 7.07E-15 |  | 6.73E-16 |
| 320 | 6.04E-23 |  | 3.24E-21 |  | 8.72E-15 |  | 8.46E-16 |
| 330 | 5.93E-23 |  | 2.69E-21 |  | 1.06E-14 |  | 1.05E-15 |

|     |          |  |          |          |  |          |
|-----|----------|--|----------|----------|--|----------|
| 340 | 5.83E-23 |  | 2.26E-21 | 1.29E-14 |  | 1.29E-15 |
| 350 | 5.75E-23 |  | 1.92E-21 | 1.54E-14 |  | 1.57E-15 |
| 360 | 5.69E-23 |  | 1.65E-21 | 1.83E-14 |  | 1.90E-15 |
| 370 | 5.65E-23 |  | 1.43E-21 | 2.15E-14 |  | 2.27E-15 |
| 380 | 5.61E-23 |  | 1.25E-21 | 2.52E-14 |  | 2.69E-15 |
| 390 | 5.59E-23 |  | 1.11E-21 | 2.93E-14 |  | 3.17E-15 |
| 400 | 5.57E-23 |  | 9.84E-22 | 3.38E-14 |  | 3.71E-15 |
| 410 | 5.57E-23 |  | 8.81E-22 | 3.89E-14 |  | 4.32E-15 |
| 420 | 5.57E-23 |  | 7.93E-22 | 4.44E-14 |  | 4.99E-15 |
| 430 | 5.58E-23 |  | 7.19E-22 | 5.05E-14 |  | 5.74E-15 |
| 440 | 5.60E-23 |  | 6.55E-22 | 5.71E-14 |  | 6.56E-15 |
| 450 | 5.62E-23 |  | 6.00E-22 | 6.43E-14 |  | 7.47E-15 |
| 460 | 5.65E-23 |  | 5.53E-22 | 7.22E-14 |  | 8.47E-15 |
| 470 | 5.69E-23 |  | 5.11E-22 | 8.07E-14 |  | 9.56E-15 |
| 480 | 5.73E-23 |  | 4.75E-22 | 8.98E-14 |  | 1.07E-14 |
| 490 | 5.77E-23 |  | 4.42E-22 | 9.97E-14 |  | 1.20E-14 |
| 500 | 5.82E-23 |  | 4.14E-22 | 1.10E-13 |  | 1.34E-14 |
| 510 | 5.87E-23 |  | 3.89E-22 | 1.22E-13 |  | 1.49E-14 |
| 520 | 5.93E-23 |  | 3.66E-22 | 1.34E-13 |  | 1.66E-14 |
| 530 | 5.99E-23 |  | 3.46E-22 | 1.47E-13 |  | 1.83E-14 |
| 540 | 6.05E-23 |  | 3.28E-22 | 1.60E-13 |  | 2.02E-14 |
| 550 | 6.12E-23 |  | 3.11E-22 | 1.75E-13 |  | 2.21E-14 |

### S.2.3 Termolecular rate constants

Termolecular Rate Constants [  $K(3B)*k_{uni\_j}$  ]

|     | k_ter_1  |  | k_ter_2  |  | k_ter_3  |  | k_ter_4  |
|-----|----------|--|----------|--|----------|--|----------|
| 250 | 1.40E-39 |  | 1.86E-37 |  | 6.56E-37 |  | 6.37E-37 |
| 250 | 1.40E-39 |  | 1.86E-37 |  | 6.56E-37 |  | 6.37E-37 |
| 260 | 1.91E-39 |  | 1.87E-37 |  | 6.53E-37 |  | 6.36E-37 |
| 270 | 2.56E-39 |  | 1.91E-37 |  | 6.61E-37 |  | 6.44E-37 |
| 280 | 3.38E-39 |  | 1.98E-37 |  | 6.76E-37 |  | 6.59E-37 |
| 290 | 4.41E-39 |  | 2.06E-37 |  | 6.98E-37 |  | 6.80E-37 |
| 300 | 5.68E-39 |  | 2.17E-37 |  | 7.24E-37 |  | 7.07E-37 |
| 310 | 7.21E-39 |  | 2.29E-37 |  | 7.56E-37 |  | 7.37E-37 |
| 320 | 9.08E-39 |  | 2.43E-37 |  | 7.91E-37 |  | 7.72E-37 |

|     |          |  |          |  |          |  |          |
|-----|----------|--|----------|--|----------|--|----------|
| 330 | 1.13E-38 |  | 2.58E-37 |  | 8.30E-37 |  | 8.10E-37 |
| 340 | 1.40E-38 |  | 2.74E-37 |  | 8.72E-37 |  | 8.51E-37 |
| 350 | 1.71E-38 |  | 2.92E-37 |  | 9.19E-37 |  | 8.96E-37 |
| 360 | 2.08E-38 |  | 3.11E-37 |  | 9.68E-37 |  | 9.45E-37 |
| 370 | 2.50E-38 |  | 3.31E-37 |  | 1.02E-36 |  | 9.97E-37 |
| 380 | 3.00E-38 |  | 3.53E-37 |  | 1.08E-36 |  | 1.05E-36 |
| 390 | 3.57E-38 |  | 3.76E-37 |  | 1.14E-36 |  | 1.11E-36 |
| 400 | 4.22E-38 |  | 4.00E-37 |  | 1.20E-36 |  | 1.17E-36 |
| 410 | 4.97E-38 |  | 4.26E-37 |  | 1.27E-36 |  | 1.24E-36 |
| 420 | 5.82E-38 |  | 4.54E-37 |  | 1.34E-36 |  | 1.31E-36 |
| 430 | 6.77E-38 |  | 4.84E-37 |  | 1.42E-36 |  | 1.38E-36 |
| 440 | 7.86E-38 |  | 5.15E-37 |  | 1.49E-36 |  | 1.46E-36 |
| 450 | 9.07E-38 |  | 5.47E-37 |  | 1.58E-36 |  | 1.55E-36 |
| 460 | 1.04E-37 |  | 5.82E-37 |  | 1.67E-36 |  | 1.63E-36 |
| 470 | 1.19E-37 |  | 6.18E-37 |  | 1.76E-36 |  | 1.72E-36 |
| 480 | 1.36E-37 |  | 6.57E-37 |  | 1.85E-36 |  | 1.82E-36 |
| 490 | 1.55E-37 |  | 6.97E-37 |  | 1.95E-36 |  | 1.92E-36 |
| 500 | 1.76E-37 |  | 7.40E-37 |  | 2.06E-36 |  | 2.03E-36 |
| 510 | 1.99E-37 |  | 7.84E-37 |  | 2.17E-36 |  | 1.98E-36 |
| 520 | 2.24E-37 |  | 8.31E-37 |  | 2.29E-36 |  | 2.08E-36 |
| 530 | 2.51E-37 |  | 8.81E-37 |  | 2.41E-36 |  | 2.18E-36 |
| 540 | 2.81E-37 |  | 9.33E-37 |  | 2.54E-36 |  | 2.29E-36 |
| 550 | 3.14E-37 |  | 9.87E-37 |  | 2.67E-36 |  | 2.40E-36 |

Termolecular Rate Constants [ K(2B)\*k\_uni\_j ]

|     | k_ter_1  |  | k_ter_2  |
|-----|----------|--|----------|
| 250 | 1.18E-37 |  | 2.41E-36 |
| 250 | 1.18E-37 |  | 2.41E-36 |
| 260 | 1.51E-37 |  | 2.42E-36 |
| 270 | 1.90E-37 |  | 2.45E-36 |
| 280 | 2.37E-37 |  | 2.49E-36 |
| 290 | 2.94E-37 |  | 2.54E-36 |
| 300 | 3.60E-37 |  | 2.60E-36 |
| 310 | 4.37E-37 |  | 2.67E-36 |
| 320 | 5.27E-37 |  | 2.74E-36 |

|     |          |  |          |
|-----|----------|--|----------|
| 330 | 6.30E-37 |  | 2.83E-36 |
| 340 | 7.49E-37 |  | 2.92E-36 |
| 350 | 8.85E-37 |  | 3.02E-36 |
| 360 | 1.04E-36 |  | 3.13E-36 |
| 370 | 1.22E-36 |  | 3.25E-36 |
| 380 | 1.41E-36 |  | 3.37E-36 |
| 390 | 1.64E-36 |  | 3.51E-36 |
| 400 | 1.89E-36 |  | 3.65E-36 |
| 410 | 2.16E-36 |  | 3.80E-36 |
| 420 | 2.47E-36 |  | 3.96E-36 |
| 430 | 2.82E-36 |  | 4.13E-36 |
| 440 | 3.20E-36 |  | 4.30E-36 |
| 450 | 3.62E-36 |  | 4.49E-36 |
| 460 | 4.08E-36 |  | 4.68E-36 |
| 470 | 4.59E-36 |  | 4.88E-36 |
| 480 | 5.14E-36 |  | 5.10E-36 |
| 490 | 5.75E-36 |  | 5.32E-36 |
| 500 | 6.41E-36 |  | 5.55E-36 |
| 510 | 7.14E-36 |  | 5.80E-36 |
| 520 | 7.92E-36 |  | 6.06E-36 |
| 530 | 8.78E-36 |  | 6.32E-36 |
| 540 | 9.70E-36 |  | 6.60E-36 |
| 550 | 1.07E-35 |  | 6.89E-36 |

Table S.1.: Branching ratios (in percentage) for the formation of gas-phase and water-assisted mechanism products for RH=20% and RH=100%.

| T/K | 20%       |                | 100%      |                |
|-----|-----------|----------------|-----------|----------------|
|     | gas-phase | water-mediated | gas-phase | water-mediated |
| 280 | 99.9      | 0.1            | 99.6      | 0.4            |
| 290 | 99.9      | 0.1            | 99.6      | 0.4            |
| 300 | 99.8      | 0.2            | 99.2      | 0.8            |
| 310 | 99.8      | 0.2            | 99.0      | 1.0            |
| 320 | 99.7      | 0.3            | 98.7      | 1.3            |

Analytical expressions proposed by Zheng et al. (see text)

$$k = A \left( \frac{T}{300} \right)^n \exp \left( -\frac{B(T + T_0)}{T^2 + T_0^2} \right)$$
